# Supplementary material for: On-site airborne pathogen detection for infection risk mitigation
Source: Royal Society of Chemistry journal article supplement (doi:10.1039/d3cs00417a), 2023-01-01
Supplement: d3cs00417a1.pdf [file d3cs00417a1.pdf]

## Supporting Information

# On-site Airborne Pathogen Detection for Infection Risk Mitigation

Guangyu Qiu<sup>a,b,c\*</sup>, Xiaole Zhang<sup>b,c</sup>, Andrew J. DeMello<sup>d\*</sup>, Maosheng Yao<sup>e</sup>, Junji Cao<sup>f</sup>, and Jing Wang<sup>b,c\*</sup>

---

<sup>a.</sup> *Institute of Medical Robotics, School of Biomedical Engineering, Shanghai Jiao Tong University, Shanghai 200240, China*

<sup>b.</sup> *Institute of Environmental Engineering, ETH Zürich, Zürich 8093, Switzerland.*

<sup>c.</sup> *Laboratory for Advanced Analytical Technologies, Empa, Swiss Federal Laboratories for Materials Science and Technology, Dübendorf 8600, Switzerland.*

<sup>d.</sup> *Institute for Chemical and Bioengineering, Department of Chemistry and Applied Biosciences, ETH Zürich, Vladimir-Prelog-Weg1, Zürich, Switzerland.*

<sup>e.</sup> *State Key Joint Laboratory of Environmental Simulation and Pollution Control, College of Environmental Sciences and Engineering, Peking University, China.*

<sup>f.</sup> *Institute of Atmospheric Physics, Chinese Academy of Science, China.*

Table S1. Airborne pathogens that cause human infection. The microorganism feature and dose response models of airborne pathogens were collected for infection risk assessment.

| Pathogens                  | Type     | Microbiology                                                 | Hosts            | ID50 or LD50                                          | Dose response model                                        | Bioaerosols transmission                                                                                                         |
|----------------------------|----------|--------------------------------------------------------------|------------------|-------------------------------------------------------|------------------------------------------------------------|----------------------------------------------------------------------------------------------------------------------------------|
| Influenza (multi-subtypes) | Virus    | 80-120nm in diameter, Enveloped ssRNA virus                  | Human and animal | ID <sub>50</sub> = 9.45E+05 (Viral particles)         | Beta-Poisson<br>a = 5.81E-01;<br>N <sub>50</sub> =9.45E+05 | Respiratory activity                                                                                                             |
| SARS-CoV                   | Virus    | 80-120nm in diameter, Enveloped +ssRNA virus                 | Human and animal | ID <sub>50</sub> = 2.82E+02 (PFU)                     | Exponential,<br>k = 2.46E-03                               | Respiratory activity, fecal-aerosol                                                                                              |
| SARS-CoV-2                 | Virus    | 80-120nm in diameter, Enveloped +ssRNA virus                 | Human and animal | ID <sub>50</sub> = 2.27E+02 (PFU)                     | Exponential,<br>k = 3.05E-03                               | Respiratory activity, fecal-aerosol, aerosolized wastewater                                                                      |
| Adenovirus                 | Virus    | 70-100nm, nonenveloped dsDNA virus                           | Human and animal | ID <sub>50</sub> = 1.14E+00 (viral particles)         | Exponential,<br>k = 6.07E-01                               | Fecal-aerosol, aerosolized wastewater                                                                                            |
| Norovirus                  | Virus    | 27-30nm, nonenveloped +ssRNA virus                           | Human and animal | ID <sub>50</sub> =1.32E+03 (copies)                   | Exponential,<br>k = 5.25E-04                               | Aerosolized wastewater and vomit                                                                                                 |
| Rotavirus                  | Virus    | 70nm, nonenveloped dsRNA virus                               | Human and animal | ID <sub>50</sub> =6.17E+00 (Viral particles)          | Beta-Poisson<br>a = 2.53E-02;<br>N <sub>50</sub> =6.17E+00 | Fecal-aerosol, aerosolized wastewater                                                                                            |
| Rhinovirus                 | Virus    | 30 nm, nonenveloped ssRNA virus                              | Human            | ID <sub>50</sub> =1.81E+00 (Viral particles)          | Beta-Poisson<br>a = 2.21E-01;<br>N <sub>50</sub> =1.81E+00 | Respiratory activity                                                                                                             |
| Salmonella Derby           | Bacteria | Rod-like, 2-5 µm long                                        | Human and animal | 10 CFU                                                | Exponential,<br>k = 6.93E-02                               | Fecal-aerosol, aerosolized wastewater,                                                                                           |
| Streptococcus pneumoniae   | Bacteria | Spherical-shaped bacterium, 0.5 to 1.25 µm in diameter       | Human and animal | 10 <sup>4</sup> CFU                                   | Exponential,<br>k = 6.93E-05                               | Respiratory activity, inhalation of aerosolized wastewater                                                                       |
| Bacillus anthracis         | Bacteria | rod-shaped, 1 to 1.2 µm in width and 3 to 5 µm in length     | Human and animal | LD <sub>50</sub> =4.2E+04 (colony-forming units, CFU) | Exponential,<br>k = 1.65E-05                               | Inhalation of airborne spores                                                                                                    |
| Escherichia coli           | Bacteria | rod-shaped, 2.0 µm in length and 0.5 µm in diameter          | Human and animal | ID <sub>50</sub> =2.11E+06 CFU                        | Beta-Poisson<br>a = 1.55E-01;<br>N <sub>50</sub> =2.11E+06 | Fecal-aerosol, aerosolized wastewater                                                                                            |
| Legionella pneumophila     | Bacteria | rod-shaped, 0.3 -0.9 µm in width and 2 -20 µm in length      | Human and animal | 1.16E+01 CFU                                          | Exponential,<br>k = 5.99E-02                               | Inhalation aerosolized water                                                                                                     |
| Neisseria meningitidis     | Bacteria | oval-shaped, 0.6-1.0 µm in diameter and 1.5-2.5 µm in length | Human            | 10 CFU                                                | Exponential,<br>k = 6.93E-02                               | Respiratory activity and respiratory secretions; aerosolized water droplet.                                                      |
| Mycobacterium avium        | Bacteria | Rod-shaped, 1-4 µm long and 0.2-0.5 µm in width              | Human and animal | 1000 CFU                                              | Exponential,<br>k = 6.93E-04                               | Aerosolized water droplet and dust particles.                                                                                    |
| Mycobacterium tuberculosis | Bacteria | Rod-shaped, 2-4 µm long and 0.2-0.5 µm in width              | Human            | 10 CFU                                                | Exponential,<br>k = 6.93E-02                               | Exhalation aerosols from infected persons                                                                                        |
| Aspergillus versicolor     | Fungi    | flask-shaped, 150-300 µm in length and 4-6 µm in width       | Human            | N.A.                                                  | N.A.                                                       | Emission of spores from the fungus, aerosolized dusts, air conditioning systems                                                  |
| Aspergillus niger          | Fungi    | spherical-shaped bacterium, 2-4 µm in diameter               | Human and animal | N.A.                                                  | N.A.                                                       | Aerosolized particles from soil or decaying vegetation; bronchoscopy or surgery in healthcare settings, air conditioning systems |
| Penicillium citrinum       | Fungi    | lemon-shaped, 2-3 µm wide and 4-6 µm long                    | Human            | N.A.                                                  | N.A.                                                       | Emission of spores from the fungus, aerosolized dusts, air conditioning systems                                                  |
| Penicillium spinulosum     | Fungi    | globose or ellipsoidal in shape, 2-4 µm in diameter          | Human and animal | N.A.                                                  | N.A.                                                       | Aerosolized particles from soil, dust and decaying vegetation                                                                    |

**Approximate Beta-Poisson dose response model is specified as:**

$$P_I(d) = 1 - \left(1 + \frac{d}{\beta}\right)^{-a} = 1 - \left(1 + d \frac{2^{\frac{1}{a}} - 1}{N_{50}}\right)^{-a}$$

where  $d$  is the infection dose,  $N_{50}$  is the median effective (mean) dose level.  $a$  is the optimized parameter for calculating beta-Poisson infection probabilities.

**Approximate Exponential dose response model is specified as:**

$$P_I(d) = 1 - e^{(-k \times d)}$$

where  $d$  is the infection dose,  $k$  is the optimized parameter for calculating exponential infection probabilities.

Table S2. Representative high exposure environments and reported airborne pathogen transmission cases.

| Potential sites for on-site detection | Emission activities                                          | Pathogens                      | Exposure scenario and periods                                                                                            | Reported infection cases                                                                                              | Airborne virus concentration or quanta emission rate                                                              | Ref.          |
|---------------------------------------|--------------------------------------------------------------|--------------------------------|--------------------------------------------------------------------------------------------------------------------------|-----------------------------------------------------------------------------------------------------------------------|-------------------------------------------------------------------------------------------------------------------|---------------|
| Hospital                              | Breathing and brief/short communication at light activity    | Virus (SARS-CoV-2)             | 10~15 minutes (with face masks) in a typical medical room (15m <sup>2</sup> )                                            | A cluster outbreak in a children's medical center. 9 individuals (6 HCWs, two children and 1 mother) were infected    | No measurement results available. Other studies suggested a concentration range 1600~5700 copies/m <sup>3</sup> . | <sup>1</sup>  |
|                                       | Breathing, talking                                           | Virus (SARS-CoV-2)             | >15 min exposure for HCWs in the patient ward                                                                            | A cluster outbreak from one patient to 38 staffs and 14 patients                                                      | No measurement results available.                                                                                 | <sup>2</sup>  |
|                                       | Airborne no clear source (humidity issue found)              | Fungus (Aspergillus fumigatus) | Patient long-term exposure in hospital ICU,                                                                              | Patient infection in hospital ICU                                                                                     | Airborne pathogen concentration reported to be 16-640 CFU/m <sup>3</sup>                                          | <sup>3</sup>  |
|                                       | Ventilating air                                              | Bacteria (L. pneumophila)      | Exposure lasts for hours and days                                                                                        | Outbreak with 44 infectee including patients, employees, visitors, or passers-by                                      | No measurement results available.                                                                                 | <sup>4</sup>  |
| Hotel                                 | Breathing                                                    | Virus (SARS-CoV-2)             | Airborne transmission across the corridor of two hotel room                                                              | A fully vaccinated traveller staying in a hotel room across the corridor was infected from the index patient          | No measurement results available.                                                                                 | <sup>5</sup>  |
| Restaurant                            | Breathing, speaking at a light activity                      | Virus (SARS-CoV-2)             | Restaurant room of 431 m <sup>3</sup> in volume and 145 m <sup>2</sup> in area. Air exchange rate 0.67 h <sup>-1</sup> . | A cluster infection occurred at adjacent tables (with 1 m distance). Exposure time: 53~73 min                         | With a low ventilation rate, the quanta emission rate is estimated to be 79.3 quanta/h.                           | <sup>6</sup>  |
| Public transportation: bus            | Breathing (no speaking)                                      | Virus (SARS-CoV-2)             | 60.42 m <sup>3</sup> in Bus-1 with 200min exposure, and 21.69 m <sup>3</sup> in Bus-2 with 60 min exposure               | Ten passengers were infected on two buses by an index case. 7/46 and 2/17 infection reported respectively.            | Simulated concentration with tracer gas: 603.2 ppm and 251.7 ppm in bus-1 and bus-2 respectively.                 | <sup>7</sup>  |
| Public transportation: aircraft       | Breathing and coughing (other routes could not be ruled out) | Virus (SARS-CoV-2)             | Passengers in adjacent seats (business class). Total flight period was 10 hours.                                         | A cluster of 16 infection cases by a symptomatic passenger.                                                           | No measurement results available.                                                                                 | <sup>8</sup>  |
| School                                | Breathing, speaking and activates                            | Virus (SARS-CoV-2)             | Class aera is 39-49 m <sup>2</sup> , and 1.1-1.3 m <sup>2</sup> for each student                                         | Two potential "index cases" caused 153 student and 25 staff members infected                                          | No measurement results available.                                                                                 | <sup>9</sup>  |
| Office and workplace                  | Speaking                                                     | Virus (SARS-CoV-2)             | 6-8 hours in a 19-story floor                                                                                            | 94 cases (out of 216) reported in the call center                                                                     | No measurement results available                                                                                  | <sup>10</sup> |
|                                       | Ventilating air                                              | Bacteria (L. pneumophila)      | Not available                                                                                                            | 6 infection cases at a police headquarters building                                                                   | No measurement results available                                                                                  | <sup>11</sup> |
| Choir                                 | Singing and deeply breathing                                 | Virus (SARS-CoV-2)             | Rehearsal hall with 810 m <sup>3</sup> in volume, and the duration is 2.5 hours. Air exchange rate 0.5 h <sup>-1</sup> . | One person with cold-like symptom caused a cluster outbreak, 53(out of 61) were confirmed to have contracted COVID-19 | Emission rate of 970 ± 390 quanta/h                                                                               | <sup>12</sup> |

Table S3. Overview of sampling and biosensing techniques for on-site airborne pathogen detection.

| Diseases                           | Pathogens                | Types | Sampling techniques                                                                         | Flowrate & Efficiency                                      | Biosensing techniques                                                                    | Limit of detection (LOD)                               | Highlights                                                                                                                                                                      | Ref.          |
|------------------------------------|--------------------------|-------|---------------------------------------------------------------------------------------------|------------------------------------------------------------|------------------------------------------------------------------------------------------|--------------------------------------------------------|---------------------------------------------------------------------------------------------------------------------------------------------------------------------------------|---------------|
| Novel coronavirus disease COVID-19 | SARS-CoV-2               | Virus | Integrated <b>condensational</b> particle growth and swirling <b>impingement</b> techniques | 12.5 L/min, collection efficiency >90% for viral particles | Localized surface plasmon resonance (LSPR) biosensors with thermoplasmonic amplification | 0.25 copies/ $\mu$ L in liquid and 6.7 copies/L in air | The airborne virus biosensing results were translated to probabilities of SARS-CoV-2 infection risk and to estimate maximum exposure durations to an acceptable risk threshold. | <sup>13</sup> |
| Novel coronavirus disease COVID-19 | SARS-CoV-2               | Virus | <b>Condensation</b> growth-based wet-wall <b>cyclone</b> sampler                            | 1000 L/min                                                 | Nanobody-based ultrasensitive micro-immunoelectrode biosensor                            | 7-35 viral RNA copies/ $m^3$ in air                    | >95% collection efficiency for particles >1 $\mu$ m; a cut-off diameter of 0.4 $\mu$ m; 5 min detection time resolution.                                                        | <sup>14</sup> |
| Novel coronavirus disease COVID-19 | SARS-CoV-2               | Virus | <b>Filtration</b> based aerosol sampler                                                     | 60 L/min                                                   | Continuous-Flow Electrochemical Bioassay                                                 | 0.1 copies/ $\mu$ L in liquid                          | Quantitation of real-world HCoV-229E and SARS-CoV-2 in airborne particulate matters; Off-site biosensing.                                                                       | <sup>15</sup> |
| Novel coronavirus disease COVID-19 | SARS-CoV-2               | Virus | PTF filter ( <b>filtration</b> )                                                            | 50–250 L/min                                               | Microfluidic fluorescence system                                                         | 10 copies/ $\mu$ L in liquid                           | Good precision (CV % $\leq$ 5.0%) in rapid detection of SARS-CoV-2.                                                                                                             | <sup>16</sup> |
| Novel coronavirus disease COVID-19 | SARS-CoV-2               | Virus | Passive sampling setting                                                                    | N.A.                                                       | Spark-induced plasma spectroscopy                                                        | 1000 to 3000 PFU/mL                                    | Real-time detection of virus propagation; instantaneous monitoring of high concentration coronavirus;                                                                           | <sup>17</sup> |
| Novel coronavirus disease COVID-19 | SARS-CoV-2               | Virus | Impactor ( <b>impaction</b> )                                                               | Breath flow (0.6L/s)                                       | RT-qPCR on the sampling silicon chip                                                     | 10-100 copies/ $\mu$ L in liquid                       | Comparable clinical sensitivity and specificity to swab-based testing; potential for early diagnostics and transmission control.                                                | <sup>18</sup> |
| Novel coronavirus disease COVID-19 | SARS-CoV-2               | Virus | <b>Filtration</b> collector integrated onto facemask                                        | Human breath flow                                          | qualitative colorimetric LAMP and antibody-based dot blot assays                         | Qualitative assay                                      | Combining nucleic acid test and immunoassay test;                                                                                                                               | <sup>19</sup> |
| Respiratory disease                | Human coronavirus-229E   | Virus | <b>Electrostatic</b> air sampler                                                            | 4–10 L/min; the ATH EC up to 67,000                        | qRT-PCR                                                                                  | 0.4 PFU/mL in liquid                                   | Enrich the aerosolized viral particles more than $10^6$ -fold; 10 min enrichment time.                                                                                          | <sup>20</sup> |
| Respiratory disease                | Human coronavirus -229E  | Virus | <b>Electrostatic</b> air sampler                                                            | 100 L/min (collection efficiency of $71 \pm 7\%$ )         | qRT-PCR                                                                                  | $10^3$ copies/mL in liquid                             | Airborne viruses enriched by $3.5 \times 10^5$                                                                                                                                  | <sup>21</sup> |
| Respiratory disease                | Human coronaviruses-OC43 | Virus | Condensation-based air sampler (condensation growth and <b>impaction</b> )                  | 6 L/min                                                    | Electrochemical biosensor with carbon nanotube-coated porous paper                       | 65.7 PFU/mL in liquid;                                 | The TAT is 2 min for liquid-borne viruses; 10 min TAT for airborne viruses.                                                                                                     | <sup>22</sup> |

| Diseases                 | Pathogens                                  | Types    | Sampling techniques                                                                     | Flowrate & Efficiency                                       | Biosensing techniques                                                          | Limit of detection (LOD)                                    | Highlights                                                                                                           | Ref.          |
|--------------------------|--------------------------------------------|----------|-----------------------------------------------------------------------------------------|-------------------------------------------------------------|--------------------------------------------------------------------------------|-------------------------------------------------------------|----------------------------------------------------------------------------------------------------------------------|---------------|
| Influenza                | AIV/H1N1                                   | Virus    | <b>Impaction</b> on sampling pad                                                        | 100 L/min (81.7% transfer efficiency to the detection zone) | Up-conversion nanoparticle labeling and NIR emission                           | 10 <sup>4.294</sup> EID50/m <sup>3</sup> in air             | Integrated sampling/monitoring platform for on-site detection of airborne viruses; 20min TAT.                        | <sup>23</sup> |
| Influenza                | AIV/H1N1                                   | Virus    | <b>Electrostatic</b> air sampler                                                        | 4–10 L/min; ATH EC up to 70,400                             | qRT-PCR (offline analysis)                                                     | 1.21 PFU/mL in liquid                                       | Enrich the aerosolized viral particles more than 10 <sup>6</sup> -fold.                                              | <sup>20</sup> |
| Influenza                | AIV/H1N1                                   | Virus    | <b>Electrostatic</b> particle concentrator (EPC)                                        | 1.2 L/min                                                   | Electrochemical paper immunosensors                                            | 2.13 PFU/mL in liquid and 21.1 TCID50/m <sup>3</sup> in air | Comparable to qPCR but much quicker and more cost-effective; antigenicity loss upon exposure of electrostatic field. | <sup>24</sup> |
| Influenza                | AIV/H1N1                                   | Virus    | Viable virus aerosol sampler (VIVAS) based on the <b>condensational</b> particle growth | 6 L/min                                                     | Integrated RT-LAMP (integrated sample-preparation/amplification device (SPAD)) | 1 TCID50 H1N1 in 140 μL liquid; 1 TCID50/L in air           | 1 hour TAT; sensitivity can be improved by increasing the aerosol collection time.                                   | <sup>25</sup> |
| Influenza                | AIV/H1N1                                   | Virus    | Lab-made <b>electrostatic</b> air sampler                                               | 100 L/min, collection efficiency 0.7 ± 0.04;                | Antibody functionalized electrochemical biosensor (with alkaline phosphatases) | 0.01 PFU/mL in liquid                                       | Sensitivity enhancement with electrochemical marker, alkaline phosphatases.                                          | <sup>26</sup> |
| Influenza                | H3N2                                       | Virus    | <b>Electrostatic</b> air sampler                                                        | 4–10 L/min; ATH EC up to 69,000                             | qRT-PCR (offline analysis)                                                     | 3.81 PFU/mL in liquid                                       | Enrich the aerosolized viral particles more than 10 <sup>6</sup> -fold.                                              | <sup>20</sup> |
| Influenza                | H3N2                                       | Virus    | Disposable integrated <b>impaction</b> sampler                                          | Collection efficiency >97% (300nm viral particles)          | Fluorescent biosensors                                                         | 8.3 × 10 <sup>3</sup> viral particles/L                     | Labeling the virus with fluorescent dyes by the antigen–antibody reaction; TAT is 10 min.                            | <sup>27</sup> |
| Influenza                | H3N2                                       | Virus    | <b>Electrostatic</b> air sampler                                                        | 5 L/min                                                     | Electronical silicon nanowire (SiNW) sensor                                    | 10 <sup>4</sup> viruses/L in air                            | Using target-specific antibodies for pathogens detection; fast quantification in a real-time manner.                 | <sup>28</sup> |
| Influenza                | Influenza A virus                          | Virus    | NIOSH 2-stage <b>cyclone</b> aerosol sampler                                            | 3.5 L/min                                                   | qRT-PCR (offline analysis)                                                     | 10-100 copies/μL in liquid                                  | 53% of detectable influenza virus particles were within the respirable aerosol fraction                              | <sup>29</sup> |
| Gastrointestinal disease | Cryptosporidium oocysts, and Giardia cysts | Bacteria | Microfilters ( <b>Filtration</b> )                                                      | 2 mL/min, with recovery rate of 90%                         | loop-mediated isothermal amplification (LAMP)                                  | Not provided                                                | Integration of the microfilter and a LAMP chip on a portable device for airborne pathogens analysis.                 | <sup>30</sup> |

| Diseases                                | Pathogens                           | Types    | Sampling techniques                                                              | Flowrate & Efficiency                                                               | Biosensing techniques                                | Limit of detection (LOD)                               | Highlights                                                                                                                           | Ref.          |
|-----------------------------------------|-------------------------------------|----------|----------------------------------------------------------------------------------|-------------------------------------------------------------------------------------|------------------------------------------------------|--------------------------------------------------------|--------------------------------------------------------------------------------------------------------------------------------------|---------------|
| Tuberculosis                            | Mycobacterium tuberculosis          | Bacteria | Microfluidic enrichment system                                                   | Serving for enrichment only, with 100% collection efficiency                        | Fluorescence imaging technique                       | 10 <sup>3</sup> cells/mL in liquid                     | Microfluidic system capable of airborne bacteria capture, enrichment, and rapid immunoassay; works in a sample-in-result-out manner. | <sup>31</sup> |
| Skin and soft tissue infections         | Staphylococcus aureus               | Bacteria | <b>Filtration</b> with copper mesh electrodes                                    | 1.5 L/min, 99.9% collection efficiency                                              | EIS electrochemical sensors and SERS                 | 1.26 × 10 <sup>3</sup> CFU/m <sup>3</sup> in air       | SERS for distinguish S. aureus ATCC 6538, E. coli JM109 and Candida albicans                                                         | <sup>32</sup> |
| Skin and soft tissue infections         | Staphylococcus aureus               | Bacteria | Electrostatic sampler                                                            | 100 L/min with 71 ± 7% collection efficiency                                        | Colorimetric analysis with CRISPR Cas12a             | 5 pM bacteria DNA in liquid                            | Multiplexing by changing the crRNA sequence; smartphone-based readout system for qualitative detection.                              | <sup>33</sup> |
| Respiratory tract infections            | Bacillus atrophaeus                 | Bacteria | <b>Electrostatic</b> precipitator with electrowetting-on-dielectric concentrator | 5 mL/min, 80% collection efficiency for 4 μm particles and 50% for 1.5 μm particles | HRP-immunoassay                                      | 4 × 10 <sup>4</sup> cfu/ml                             | Assay times between six to ten minutes; detection of airborne pathogens for concerning chemical and biological warfare (CBW).        | <sup>34</sup> |
| Plant diseases                          | Alternaria alternata                | Fungi    | BioSampler ( <b>impingement</b> , BAMI)                                          | 12.5 L/min                                                                          | Two-channel carbon nanotube field-effect transistors | 10 pg/mL                                               | BAMI enable the air-to-liquid sampling, solution transport, sensor regeneration, and detection of fungal particles.                  | <sup>35</sup> |
| Plant disease                           | Phakopsora pachyrhizi               | Fungi    | Microfiber for <b>filtration</b> sampling                                        | 30–100 L/min                                                                        | Aptamer-based electrochemical sensor                 | 100–200 spores per cm <sup>2</sup> of electrode area   | Fiber electrode employed for both filtration sampling and electrochemical detection                                                  | <sup>36</sup> |
| Human asthma                            | Aspergillus niger                   | Fungi    | Microfluidic enrichment system ( <b>inertial impaction</b> )                     | Collection efficiency of 97.4% at 20 min and 82.5% at 60 min;                       | Immune-fluorescence imaging method                   | 20 spores, equivalent to 300 spores/m in air           | Whole analysis completed in 2-3 hours including 1 hour enrichment and 1 hour detection.                                              | <sup>37</sup> |
| UTIs, diarrheal diseases, and pneumonia | Escherichia coli                    | Bacteria | Eight-stage Andersen sampler ( <b>inertial impaction</b> )                       | 28.3 L min/L                                                                        | Surface enhanced Raman spectroscopy                  | N.A. utilized for estimating the viability of bacteria | living E. coli generate strong SERS signals; detection in a qualitative manner.                                                      | <sup>38</sup> |
| Emetic and diarrheal illnesses          | Bacillus cereus; Micrococcus luteus | Bacteria | <b>Electrostatic</b> sampler                                                     | 100 L/min with 71 ± 7% collection efficiency                                        | Colorimetric analysis with CRISPR Cas12a             | 5 pM bacteria DNA in liquid                            | Multiplexing by changing the crRNA sequence; smartphone-based readout system for qualitative detection.                              | <sup>33</sup> |

**Abbreviation in the table:** AIV, avian influenza virus; PCR, polymerase chain reaction; LAMP, loop-mediated isothermal amplification; PTFE, polytetrafluoroethylene; TAT, turnaround time, EID50, 50% egg infectious dose; TCID50, the 50% tissue culture infectious dose; CV, coefficient of variation, ATH, aerosol-to-hydrosol; EC, enrichment capacity; NIOSH, National Institute for Occupational Safety and Health; UTIs, urinary tract infections.

## Reference:

1. L. Goldberg, Y. Levinsky, N. Marcus, V. Hoffer, M. Gafner, S. Hadas, S. Kraus, M. Mor and O. Scheuerman, *Open Forum Infectious Diseases*, 2021, **8**, ofab036.
2. M. Klompas, M. A. Baker, C. Rhee, R. Tucker, K. Fiumara, D. Griesbach, C. Bennett-Rizzo, H. Salmasian, R. Wang and N. Wheeler, *Ann. Intern. Med.*, 2021, **174**, 794-802.
3. T. Demuyser, E. De Cock and E. Sermijn, *Journal of Infection and Public Health*, 2019, **12**, 904-906.
4. R. Alon, M. Sportiello, S. Kozlovski, A. Kumar, E. C. Reilly, A. Zarbock, N. Garbi and D. J. Topham, *Nature Reviews Immunology*, 2021, **21**, 49-64.
5. H. Gu, P. Krishnan, D. Y. Ng, L. D. Chang, G. Y. Liu, S. S. Cheng, M. M. Hui, M. C. Fan, J. H. Wan and L. H. Lau, *Emerging infectious diseases*, 2022, **28**, 460.
6. Y. G. Li, H. Qian, J. Hang, X. G. Chen, P. Cheng, H. Ling, S. Q. Wang, P. Liang, J. S. Li, S. L. Xiao, J. J. Wei, L. Liu, B. J. Cowling and M. Kang, *Building and Environment*, 2021, **196**.
7. C. Ou, S. Hu, K. Luo, H. Yang, J. Hang, P. Cheng, Z. Hai, S. Xiao, H. Qian and S. Xiao, *Building and environment*, 2022, **207**, 108414.
8. N. C. Khanh, P. Q. Thai, H. L. Quach, N. A. H. Thi, P. C. Dinh, T. N. Duong, L. Q. T. Mai, N. D. Nghia, T. A. Tu, L. N. Quang, T. D. Quang, T. T. Nguyen, F. Vogt and D. D. Anh, *Emerging Infectious Diseases*, 2020, **26**, 2617-2624.
9. C. Stein-Zamir, N. Abramson, H. Shoob, E. Libal, M. Bitan, T. Cardash, R. Cayam and I. Miskin, *Eurosurveillance*, 2020, **25**, 2001352.
10. S. Y. Park, Y. M. Kim, S. Yi, S. Lee, B. J. Na, C. B. Kim, J. I. Kim, H. S. Kim, Y. B. Kim, Y. Park, I. S. Huh, H. K. Kim, H. J. Yoon, H. Jang, K. Kim, Y. Chang, I. Kim, H. Lee, J. Gwack, S. S. Kim, M. Kim, S. Kweon, Y. J. Choe, O. Park, Y. J. Park and E. K. Jeong, *Emerging Infectious Diseases*, 2020, **26**, 1666-1670.
11. M. Omahony, A. Lakhani, A. Stephens, J. G. Wallace, E. R. Youngs and D. Harper, *Epidemiology and Infection*, 1989, **103**, 285-292.
12. S. L. Miller, W. W. Nazaroff, J. L. Jimenez, A. Boerstra, G. Buonanno, S. J. Dancer, J. Kurnitski, L. C. Marr, L. Morawska and C. Noakes, *Indoor Air*, 2021, **31**, 314-323.
13. G. Qiu, M. Spillmann, J. Tang, Y.-B. Zhao, Y. Tao, X. Zhang, H. Geschwindner, L. Saleh, W. Zingg and J. Wang, *Advanced Science*, 2022, **9**.
14. J. V. V. Puthussery, D. P. P. Ghumra, K. R. R. McBrearty, B. M. M. Doherty, B. J. J. Sumlin, A. Sarabandi, A. G. Mandal, N. J. J. Shetty, W. D. D. Gardiner, J. P. P. Magrecki, D. L. L. Brody, T. J. J. Esparza, T. L. L. Bricker, A. C. M. Boon, C. M. M. Yuede, J. R. R. Cirrito and R. K. K. Chakrabarty, *Nature Communications*, 2023, **14**.
15. F. Jiang, B. Liu, Y. Yue, Y. Tao, Z. Xiao, M. Li, Z. Ji, J. Tang, G. Qiu, M. Spillmann, J. Cao, L. Zhang and J. Wang, *Advanced Science*, 2023, **10**.
16. H. Xiong, X. Ye, Y. Li, J. Qi, X. Fang and J. Kong, *Anal. Chem.*, 2021, **93**, 4270-4276.
17. J. H. Yang, J. Jung, S. Kim, Y. Cho and J. J. Yoh, *Sci. Total Environ.*, 2021, **770**.
18. T. Stakenborg, J. Raymenants, A. Taher, E. Marchal, B. Verbruggen, S. Roth, B. Jones, A. Yurt, W. Duthoo, K. Bombeke, M. Fauvart, J. Verplanken, R. S. Wiederkehr, A. Humbert, C. Dang, E. Vlassaks, A. L. J. Uribe, Z. Luo, C. Liu, K. Zinoviev, R. Labie, A. D. Frederiks, J. Saldien, K. Covens, P. Berden, B. Schreurs, J. Van Duppen, R. Hanifa, M. Beuscart, V. Pham, E. Emmen, A. Dewagtere, Z. Lin, M. Peca, Y. El Jerrari, C. Nawghane, C. Arnett, A. Lambrechts, P. Deshpande, K. Lagrou, P. De Munter, E. Andre, N. Van den Wijngaert and P. Peumans, *Biosens. Bioelectron.*, 2022, **217**.



19. F. Soto, M. O. Ozen, C. F. Guimaraes, J. Wang, K. Hokanson, R. Ahmed, R. L. Reis, R. Paulmurugan and U. Demirci, *Acs Applied Materials & Interfaces*, 2021, **13**, 41445-41453.
20. H. R. Kim, S. An and J. Hwang, *Biosens. Bioelectron.*, 2020, **170**.
21. H. R. Kim, S. An and J. Hwang, *J. Hazard. Mater.*, 2021, **412**.
22. D. Lee, J. Jang and J. Jang, *J. Hazard. Mater.*, 2023, **458**.
23. I. Lee, Y. Seok, H. J. Jung, B. Yang, J. Lee, J. Kim, H. Pyo, C. S. Song, W. Choi, M. G. Kim and J. Lee, *Acs Sensors*, 2020, **5**, 3915-3922.
24. J. Bhardwaj, M. W. Kim and J. Jang, *Environ. Sci. Technol.*, 2020, **54**, 10690-10702.
25. X. Jiang, J. C. Loeb, M. H. Pan, T. B. Tilly, A. Eiguren-Fernandez, J. A. Lednický, C. Y. Wu and Z. H. Fan, *Anal. Chim. Acta*, 2021, **1165**.
26. J. Shin, H. R. Kim, P. K. Bae, H. Yoo, J. Kim, Y. Choi, Y. B. Shin, J. Hwang and S. Hong, *Sci. Rep.*, 2021, **11**.
27. K. Takenaka, S. Togashi, R. Miyake, T. Sakaguchi and M. Hide, *Journal of Breath Research*, 2016, **10**.
28. F. Shen, M. Tan, Z. Wang, M. Yao, Z. Xu, Y. Wu, J. Wang, X. Guo and T. Zhu, *Environ. Sci. Technol.*, 2011, **45**, 7473-7480.
29. F. M. Blachere, W. G. Lindsley, T. A. Pearce, S. E. Anderson, M. Fisher, R. Khakoo, B. J. Meade, O. Lander, S. Davis, R. E. Thewlis, I. Celik, B. T. Chen and D. H. Beezhold, *Clin. Infect. Dis.*, 2009, **48**, 438-440.
30. Q. Liu, X. Zhang, Y. Yao, W. Jing, S. Liu and G. Sui, *Sensors and Actuators B-Chemical*, 2018, **258**, 1138-1145.
31. W. Jing, X. Jiang, W. Zhao, S. Liu, X. Cheng and G. Sui, *Anal. Chem.*, 2014, **86**, 5815-5821.
32. X. Su, R. Ren, Y. Wu, S. F. Li, C. Ge, L. L. Liu and Y. Xu, *Biosens. Bioelectron.*, 2021, **176**.
33. J. Ki, I. H. Kwon, J. Lee, J. Lim, S. Jang, S. U. Son, S. B. Seo, S. Y. Oh, T. Kang, J. Jung, K. G. Lee, J. Hwang and E.-K. Lim, *J. Hazard. Mater.*, 2023, **460**, 132398.
34. L. Coudron, M. B. McDonnell, I. Munro, D. K. McCluskey, I. D. Johnston, C. K. L. Tan and M. C. Tracey, *Biosens. Bioelectron.*, 2019, **128**, 52-60.
35. J. Kim, J.-H. Jin, H. S. Kim, W. Song, S.-K. Shin, H. Yi, D.-H. Jang, S. Shin and B. Y. Lee, *Environ. Sci. Technol.*, 2016, **50**, 5163-5171.
36. V. Krivitsky, E. Granot, Y. Avidor, E. Borberg, R. T. Voegelé and F. Patolsky, *Acs Sensors*, 2021, **6**, 1187-1198.
37. X. Li, X. Zhang, Q. Liu, W. Zhao, S. Liu and G. Sui, *Acs Sensors*, 2018, **3**, 2095-2103.
38. M. A. Tahir, X. Zhang, H. Cheng, D. Xu, Y. Feng, G. Sui, H. Fu, V. K. Valev, L. Zhang and J. Chen, *Analyst*, 2020, **145**, 277-285.
